# Supplementary material
Source: MDPI journal article supplement (https://www.mdpi.com/1999-4907/12/11/1595)
Supplement: s1 [file s1]

**Supplementary Table S1.** Survival rate, root collar diameter, height, stem volume, H/D, S/R, and T/R ratios of *Larix kaempferi* seedlings under extreme climate events by temperature and precipitation manipulations. TC: ambient temperature, T3: +3 °C warming, T6: +6 °C extreme warming, DR: drought, PC: ambient precipitation, HR: heavy rainfall. Values are means  $\pm$  S.D. (n=3 for survival rate, n=90 for RCD, height, stem volume and H/D ratio, n=9 for S/R and T/R ratios. Values with different letters in a column indicate statistical differences among treatments within a species at 5% levels by Tukey HSD test.

| Meas. month | Treatment |    | Survival rate (%) | RCD (mm)          | Height (cm)           | Stem volume (cm <sup>3</sup> ) | H/D ratio           | S/R ratio       | T/R ratio       |
|-------------|-----------|----|-------------------|-------------------|-----------------------|--------------------------------|---------------------|-----------------|-----------------|
| May         | TC        | DR | -                 | 3.17 $\pm$ 0.06 a | 31.11 $\pm$ 0.30 a    | 1.68 $\pm$ 0.62 a              | 100.0 $\pm$ 2.0     | -               | -               |
|             |           | PC | -                 | 3.20 $\pm$ 0.05 a | 30.02 $\pm$ 0.38 a    | 1.65 $\pm$ 0.58 a              | 95.3 $\pm$ 1.7      | -               | -               |
|             |           | HR | -                 | 3.31 $\pm$ 0.05 a | 30.33 $\pm$ 0.41 a    | 1.77 $\pm$ 0.55 a              | 92.9 $\pm$ 1.9      | -               | -               |
|             | T3        | DR | -                 | 3.13 $\pm$ 0.06 a | 30.42 $\pm$ 0.30 a    | 1.61 $\pm$ 0.68 a              | 99.7 $\pm$ 2.1      | -               | -               |
|             |           | PC | -                 | 3.22 $\pm$ 0.06 a | 30.63 $\pm$ 0.40 a    | 1.70 $\pm$ 0.69 a              | 96.7 $\pm$ 1.9      | -               | -               |
|             |           | HR | -                 | 3.19 $\pm$ 0.05 a | 30.55 $\pm$ 0.35 a    | 1.65 $\pm$ 0.55 a              | 97.2 $\pm$ 1.9      | -               | -               |
|             | T6        | DR | -                 | 3.26 $\pm$ 0.06 a | 29.74 $\pm$ 0.37 a    | 1.71 $\pm$ 0.66 a              | 93.0 $\pm$ 1.7      | -               | -               |
|             |           | PC | -                 | 3.24 $\pm$ 0.06 a | 31.08 $\pm$ 0.55 a    | 1.76 $\pm$ 0.77 a              | 97.3 $\pm$ 2.4      | -               | -               |
|             |           | HR | -                 | 3.31 $\pm$ 0.06 a | 29.51 $\pm$ 0.46 a    | 1.72 $\pm$ 0.78 a              | 89.8 $\pm$ 1.9      | -               | -               |
| October     | TC        | DR | 92.8 $\pm$ 8.8    | 6.96 $\pm$ 0.99 a | 55.98 $\pm$ 8.83 ab   | 13.97 $\pm$ 72.69 a            | 80.7 $\pm$ 9.8 ab   | 3.02 $\pm$ 0.17 | 4.02 $\pm$ 0.17 |
|             |           | PC | 92.4 $\pm$ 3.7    | 6.94 $\pm$ 0.89 a | 52.64 $\pm$ 9.90 ab   | 13.86 $\pm$ 62.83 a            | 75.7 $\pm$ 11.7 bcd | 2.82 $\pm$ 0.07 | 3.82 $\pm$ 0.09 |
|             |           | HR | 92.4 $\pm$ 4.7    | 6.74 $\pm$ 0.91 a | 45.94 $\pm$ 7.04 d    | 10.99 $\pm$ 47.39 b            | 68.8 $\pm$ 10.0 e   | 2.81 $\pm$ 0.17 | 3.81 $\pm$ 0.17 |
|             | T3        | DR | 97.7 $\pm$ 1.1    | 6.89 $\pm$ 0.89 a | 51.92 $\pm$ 8.57 bc   | 12.89 $\pm$ 57.16 ab           | 75.5 $\pm$ 11.3 cd  | 3.07 $\pm$ 0.10 | 4.07 $\pm$ 0.10 |
|             |           | PC | 93.9 $\pm$ 1.3    | 7.03 $\pm$ 1.15 a | 52.59 $\pm$ 11.08 bcd | 12.94 $\pm$ 80.29 ab           | 74.6 $\pm$ 10.4 cd  | 2.75 $\pm$ 0.21 | 3.75 $\pm$ 0.21 |
|             |           | HR | 95.4 $\pm$ 3.0    | 7.30 $\pm$ 0.98 a | 57.49 $\pm$ 9.92 a    | 15.37 $\pm$ 78.40 a            | 78.9 $\pm$ 10.5 abc | 3.30 $\pm$ 0.34 | 4.20 $\pm$ 0.35 |
|             | T6        | DR | 95.1 $\pm$ 3.5    | 6.93 $\pm$ 1.00 a | 56.00 $\pm$ 9.72 a    | 13.95 $\pm$ 65.58 a            | 81.2 $\pm$ 11.2 a   | 3.09 $\pm$ 0.29 | 4.09 $\pm$ 0.29 |
|             |           | PC | 92.6 $\pm$ 0.8    | 6.94 $\pm$ 0.91 a | 49.81 $\pm$ 7.08 bcd  | 12.88 $\pm$ 66.52 ab           | 72.1 $\pm$ 8.3 de   | 3.00 $\pm$ 0.24 | 4.00 $\pm$ 0.24 |
|             |           | HR | 94.3 $\pm$ 1.6    | 6.84 $\pm$ 0.90 a | 48.57 $\pm$ 9.90 cd   | 10.42 $\pm$ 73.58 b            | 70.9 $\pm$ 7.8 de   | 3.42 $\pm$ 0.52 | 4.41 $\pm$ 0.52 |

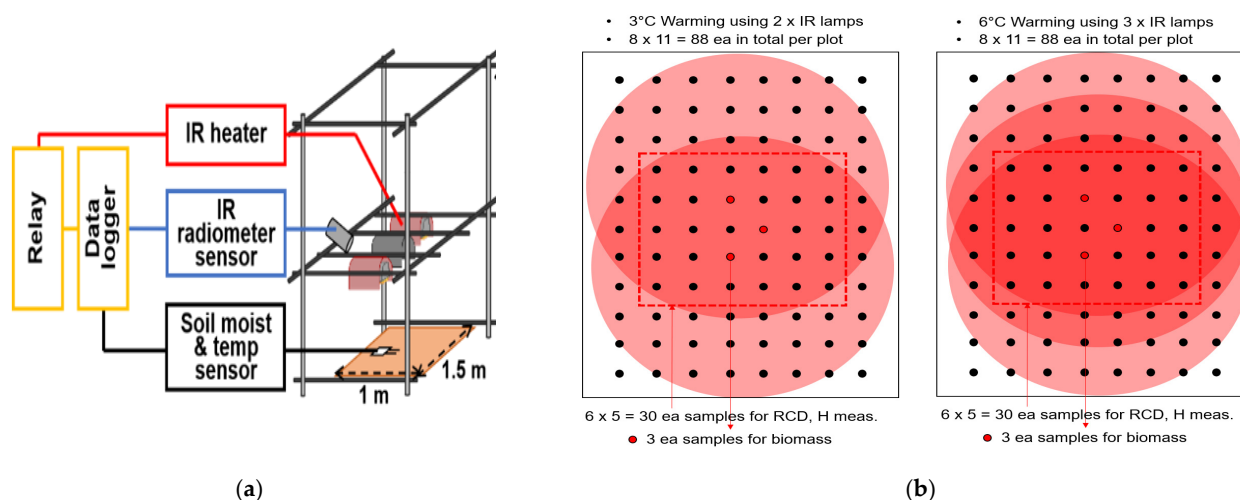

**Supplementary Figure S1.** The descriptions of (a) warming treatment system and (b) areas warmed by infrared heating lamps and locations of the sampled seedlings (30 samples for root collar diameter and height growth measurements and 3 samples for biomass measurement. (modified from Kim et al., under review)

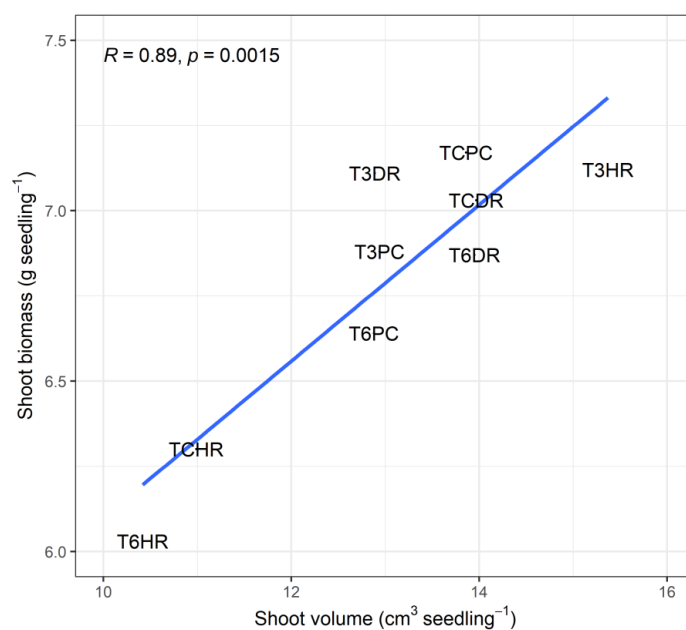

**Supplementary Figure S2.** The relationship between stem volume and stem biomass of *Larix kaempferi* seedlings across the temperature and precipitation manipulations. TC: ambient temperature, T3: +3 °C warming, T6: +6 °C extreme warming, DR: drought, PC: ambient precipitation, HR: heavy rainfall. Values are means  $\pm$  S.D. (n=9 for stem biomass, n=60 or 90 for stem volume per treatment). Result from Pearson correlation analysis is shown in the figure.
